# Supplementary material for: Evaluating the temporal and situational consistency of personality traits in adult dairy cattle
Source: PLoS One. 2018 Oct 1;13(10):e0204619. doi: 10.1371/journal.pone.0204619 (PMC6166944; doi:10.1371/journal.pone.0204619)
Supplement: S4 Table — All of the behavioral parameters were measured in seconds. (XLS) [file pone.0204619.s007.xls]

## Sheet: S3_Table
Individual Test	Mean	Median	SD	Min	Max
Spring (39 cows)
Movement Duration	211.564	210	72.528	85	352
Exploration Duration	114.385	116	52.743	24	255
Mirror Duration	123.179	100	87.458	20	413
Object Look Duration	24.667	14	45.939	0	276
Object Contact Duration	13.385	8	13.558	0	63
Human Look Duration	99.897	72	88.944	2	397
Human Contact Duration	12.564	4	17.075	0	66
Spring (33 cows)
Movement Duration	215.909	225	70.928	85	352
Exploration Duration	116.788	116	53.482	24	255
Mirror Duration	115.606	100	74.544	20	407
Object Look Duration	25.182	15	47.461	0	276
Object Contact Duration	13.455	7	14.712	0	63
Human Look Duration	95.303	70	79.889	2	378
Human Contact Duration	11.848	3	17.972	0	66
Autumn (33 cows)
Movement Duration	176.727	173	71.746	24	369
Exploration Duration	87.182	76	52.018	2	256
Mirror Duration	120.576	116	65.879	19	267
Object Look Duration	23.394	20	24.707	0	111
Object Contact Duration	7	4	10.164	0	56
Human Look Duration	91.394	59	73.929	22	303
Human Contact Duration	14.273	5	20.349	0	88
Group Test
Spring (40 cows)
Object Contact Duration	180.675	172	189.546	0	679
Autumn (25 cows)
Object Contact Duration	72.76	40	80.997	0	313
